# Supplementary material for: Mutational signatures reveal the dynamic interplay of risk factors and cellular processes during liver tumorigenesis
Source: PubMed Central journal article supplement (PMC5670220; doi:10.1038/s41467-017-01358-x), 2017-11-03
Supplement: 41467_2017_1358_MOESM1_ESM.pdf [file 41467_2017_1358_MOESM1_ESM.pdf]

**a**

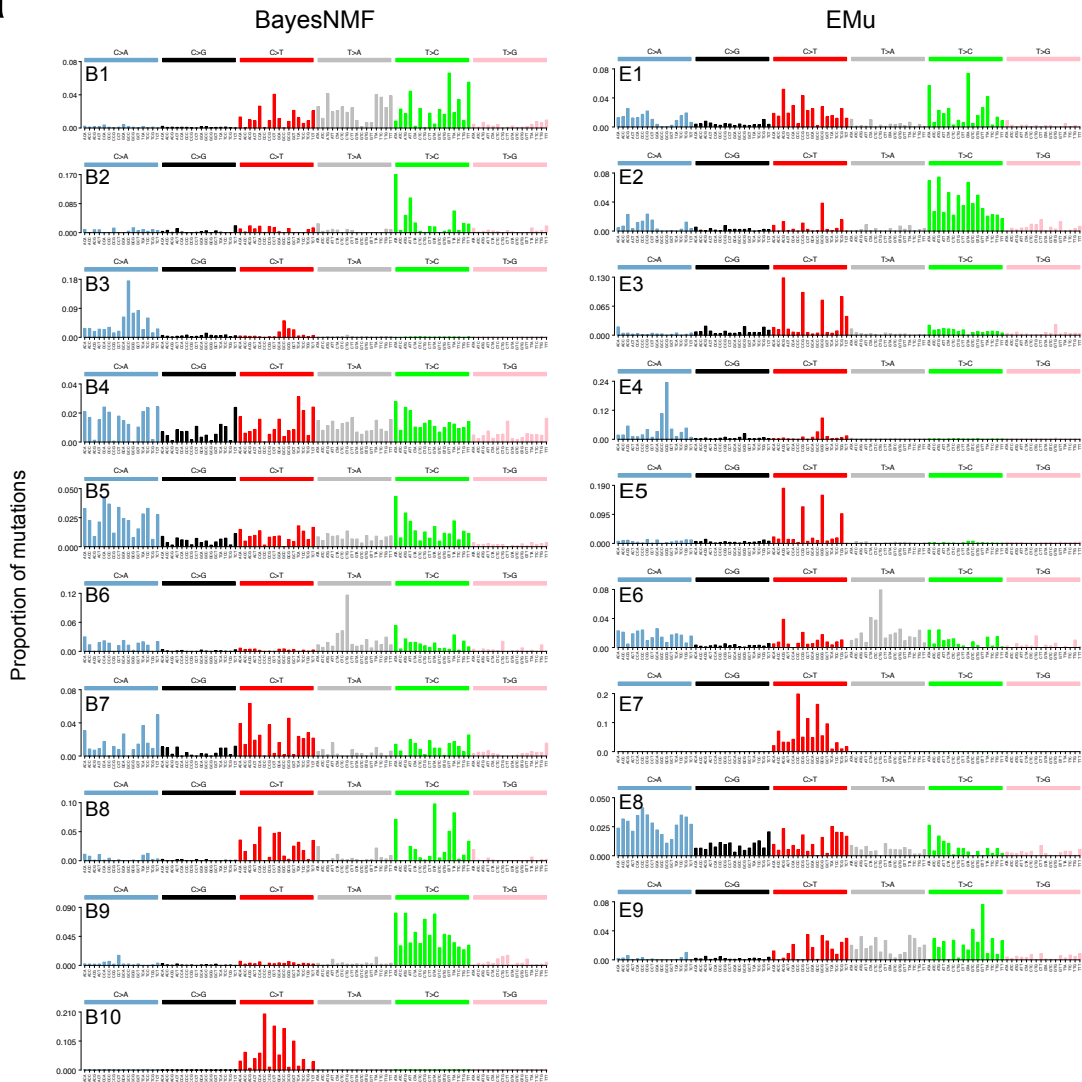

**b**

**Similarities between signatures extracted from this study and previously published (COSMIC)**

| Signature ID (COSMIC) | BayesNMF equivalent | Cosine similarity (BayesNMF) | EMu equivalent | Cosine similarity (EMu) |
|-----------------------|---------------------|------------------------------|----------------|-------------------------|
| Signature 1           | B7                  | 0.76                         | E3,E5          | 0.93,0.97               |
| Signature 4           | B5                  | 0.85                         | E8             | 0.81                    |
| Signature 5           | B4                  | 0.88                         | -              | -                       |
| Signature 12          | B9                  | 0.92                         | E2             | 0.86                    |
| Signature 16          | B2                  | 0.83                         | -              | -                       |
| Signature 22          | B6                  | 0.81                         | E6             | 0.75                    |
| Signature 23          | B10                 | 1                            | E7             | 0.97                    |
| Signature 24          | B3                  | 0.92                         | E4             | 0.64                    |

**Similarities between NOVEL signatures extracted from this study**

| Signature ID | BayesNMF | EMU | Cosine similarity |
|--------------|----------|-----|-------------------|
| Signature.N1 | B1       | E9  | 0.92              |
| Signature.N2 | B8       | E1  | 0.79              |

**Supplementary Figure 1. *De novo* mutational signature analysis in 44 liver tumors. (a)** Mutational signatures identified by BayesNMF (n=10) and EMu (n=9) in our new series of 44 liver tumors. **(b)** Correspondance between BayesNMF, EMu and COSMIC signatures. 8/10 BayesNMF and 7/9 EMu signatures correspond to known signatures already described in COSMIC. The two remaining signatures (N1 and N2) are new and similar between the two methods.

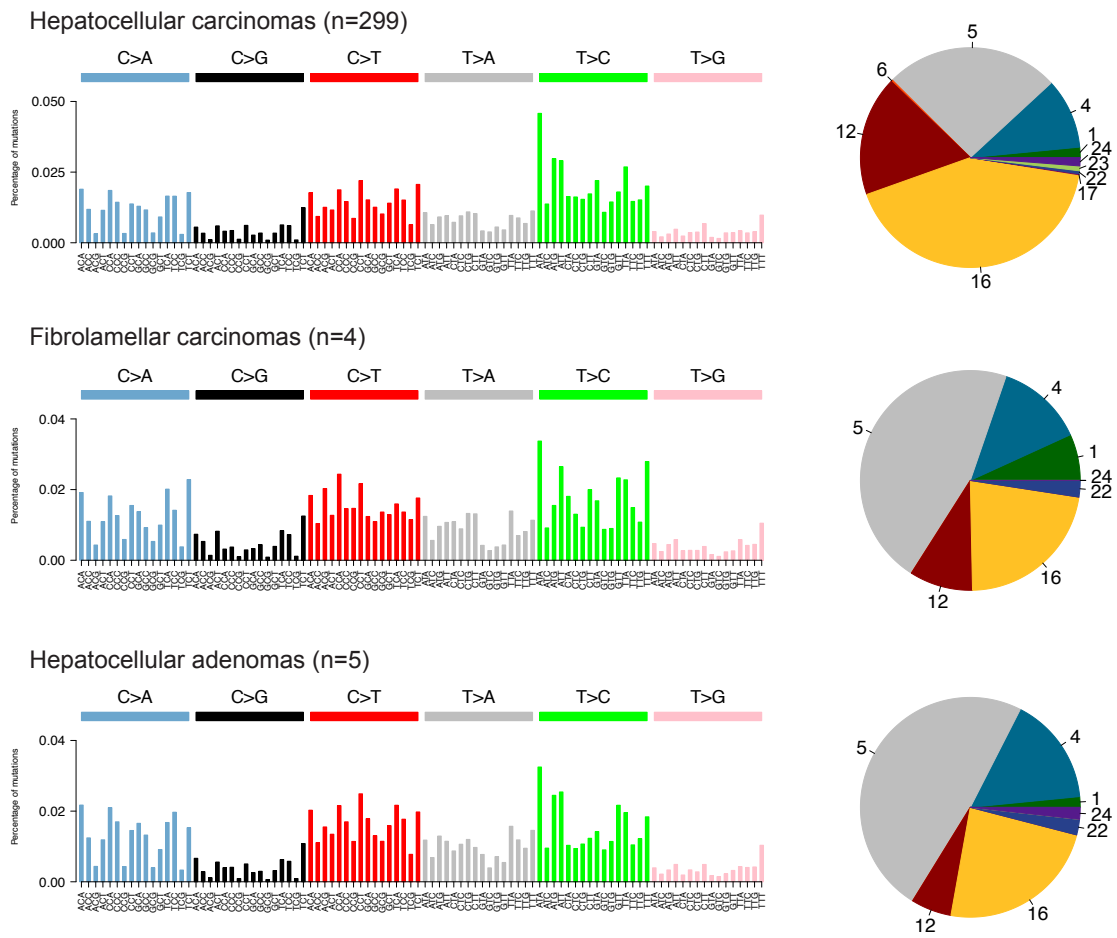

**Supplementary Figure 2. Comparison of mutational signatures between histological subtypes.** For each tumor type, the average mutational spectrum in 96 categories is represented (left) together with the average decomposition in mutational signatures (right).

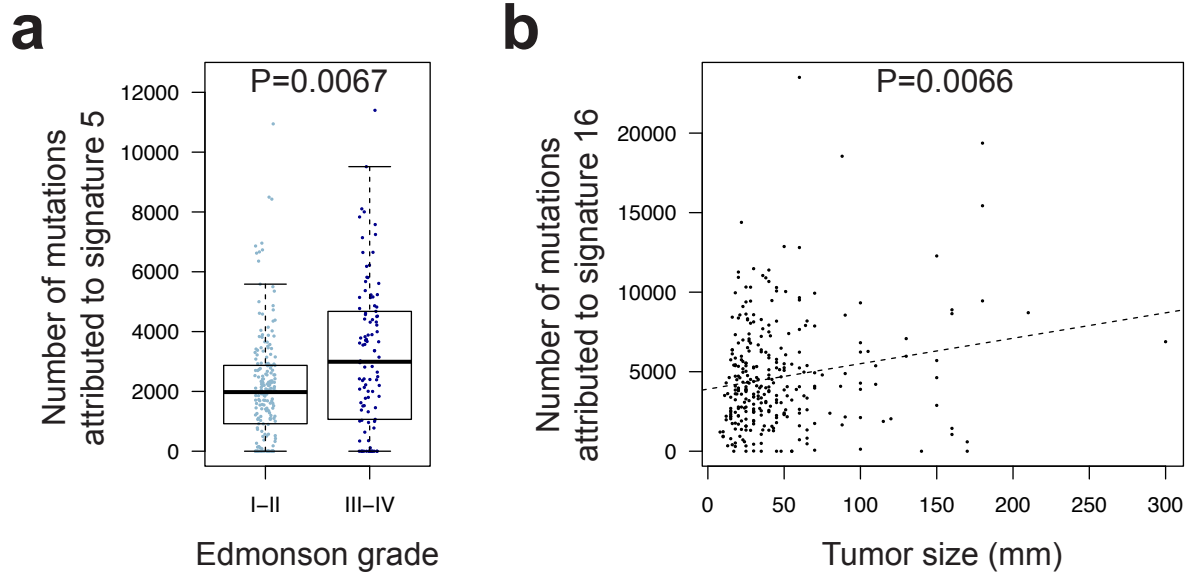

**Supplementary Figure 3: Correlation of mutational signatures with clinicopathological features.** We assessed correlations between the amount of mutations attributed to each mutational signature and clinicopathological features (fibrosis stage, tumor size, Edmonson grade and vascular invasion). Only two significant associations were detected between signature 5 and Edmonson grade (**a**) and between signature 16 and tumor size (**b**).

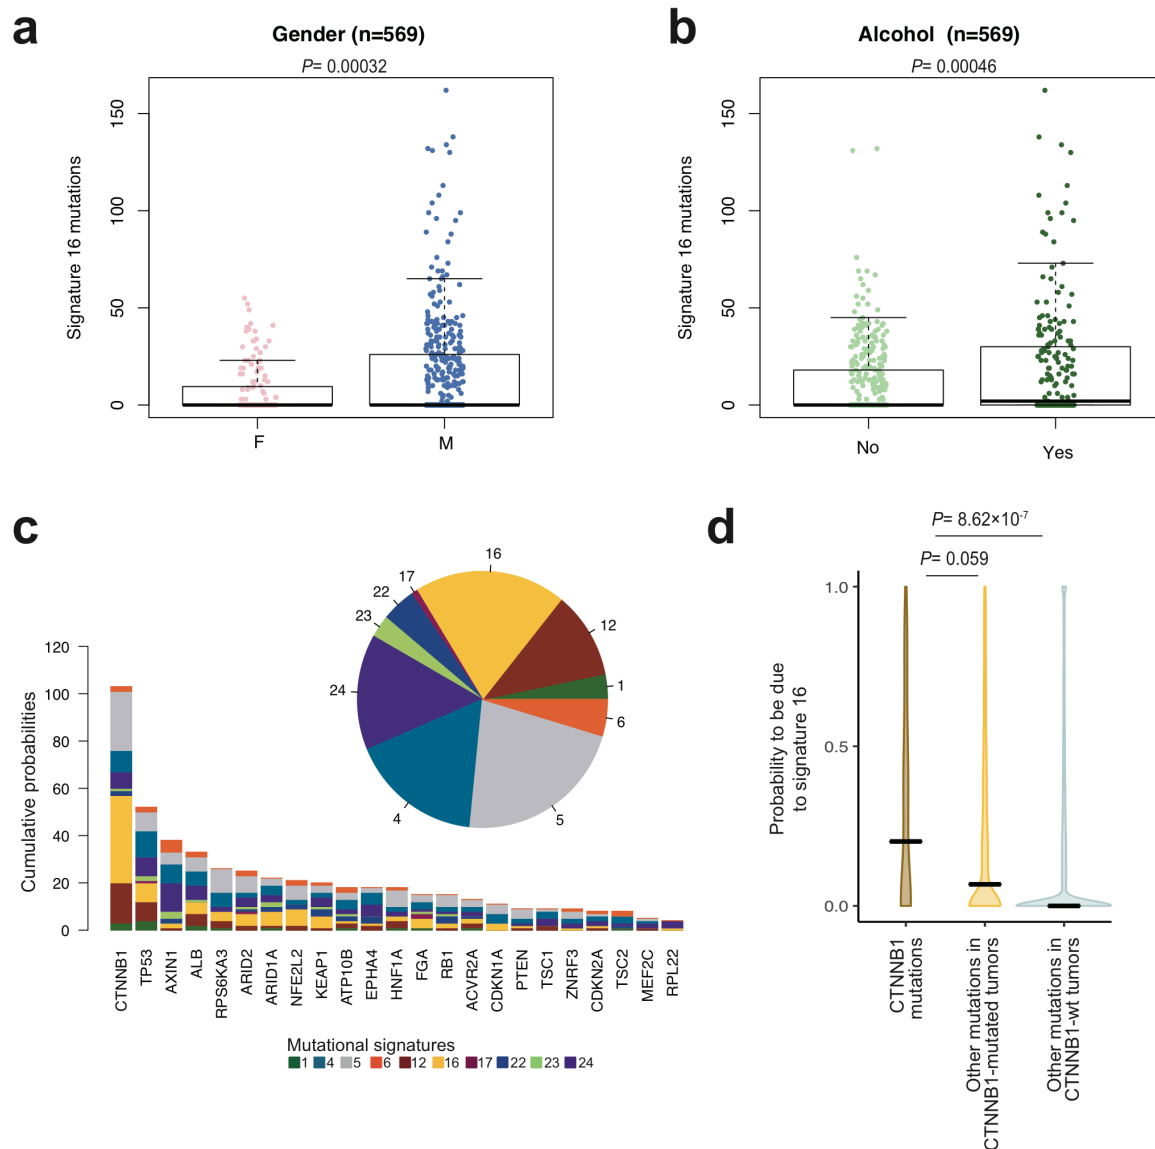

**Supplementary Figure 4: Validation of correlations between mutational signatures, risk factors and driver genes in an independent whole exome series.** (a) Association between the number of mutations attributed to mutational signature 16 and gender. (b) Association between the number of mutations attributed to mutational signature 16 and alcohol consumption. (c) Distribution of mutational signatures associated with driver gene mutations. We estimated the probability of each driver gene mutation being due to each mutational process. We then summed these probabilities over all mutations and signatures to obtain the cumulative probabilities across all driver gene mutations (pie chart) and for each driver gene separately (barplot). (d) *CTNNB1* mutations (left) overall have higher probabilities being due to signature 16 than other mutations in the same samples (middle) and in other samples (right). The violin plots represent the distribution of probabilities for each group of mutations and horizontal segments highlight median values.

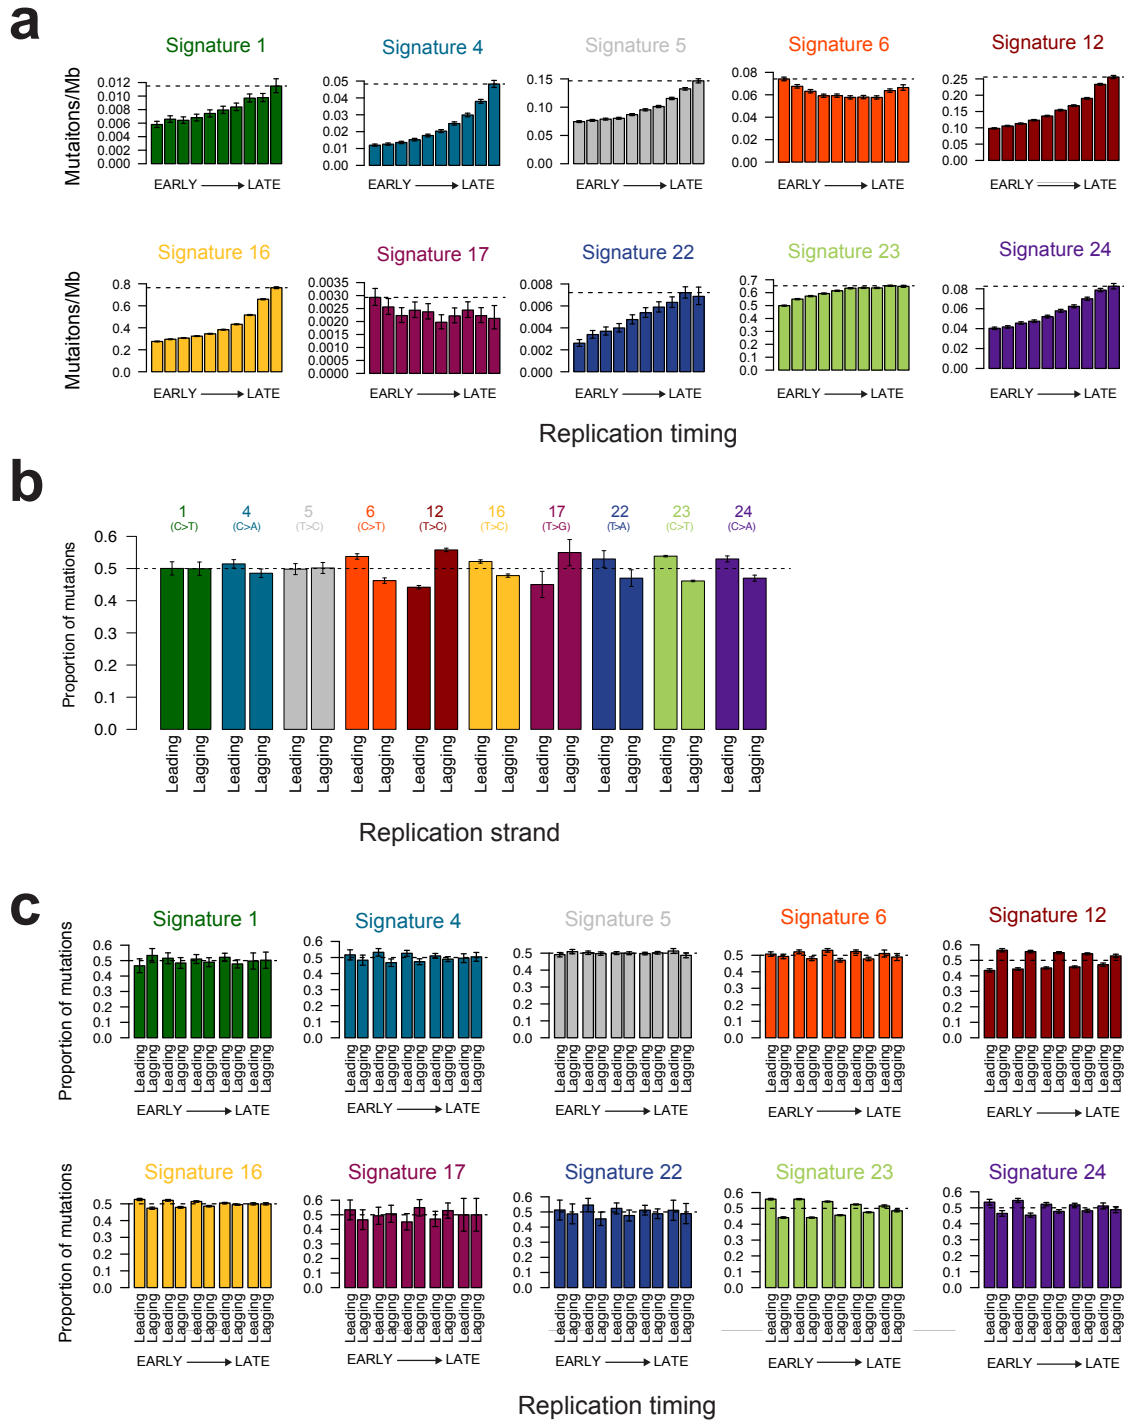

**Supplementary Figure 5. DNA replication modulates the activity of mutational signatures in HCC.** (a) Correlation between replication timing and SNV rates broken down by mutational signature. Genomic regions were classified in ten replication deciles using RepliSeq data generated by the ENCODE project for the HepG2 cell line. The mutation rate was calculated within each decile, considering only mutations attributed to a given signature with probability  $\geq 0.7$ . (b) Analysis of replicative strand asymmetries. The proportions of mutations occurring on the leading and lagging strand are represented for each mutational signature. Only the dominant substitution type (indicated in parentheses) was considered for each signature. (c) Replicative strand asymmetry was analyzed separately within each replication timing decile. The asymmetry between the two strands is stronger in early replicating regions.

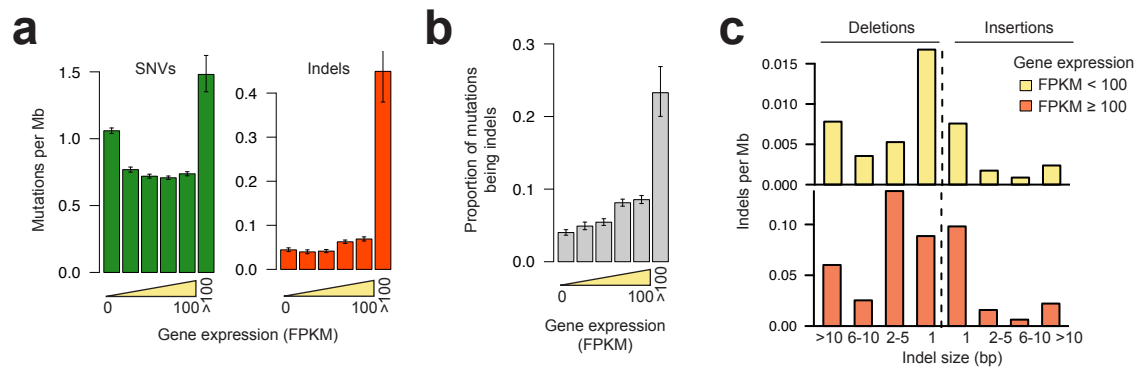

**Supplementary Figure 6: Validation of the high amount of indels associated with very highly expressed genes in an independent whole exome series.** (a) Number of single nucleotide variants (SNVs, left) and small insertions and deletions (indels, right) per megabase in genes as a function of expression level. Genes with expression between 0 and 100 fragments per kilobase of exons per million reads (FPKM) were divided in 5 gene expression quintiles. A separate group was created for very highly expressed genes (FPKM $\geq$ 100). Error bars indicate the 95% confidence intervals of the estimated mutation rates. (b) Proportion of mutations being indels as a function of expression level. For each gene expression group, the proportion of mutations being indels was estimated as the number of indels divided by the number of SNVs + indels in genes belonging to the expression group. Error bars indicate the 95% confidence intervals of the estimated mutation rates. (c) Distribution of indel types and sizes in very highly expressed (FPKM $\geq$ 100) versus all other genes.

**a**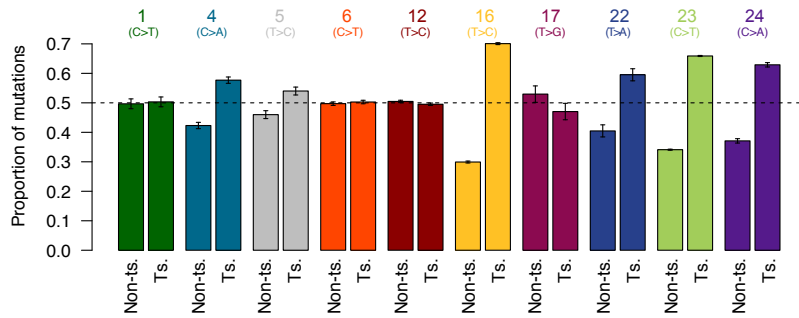**b**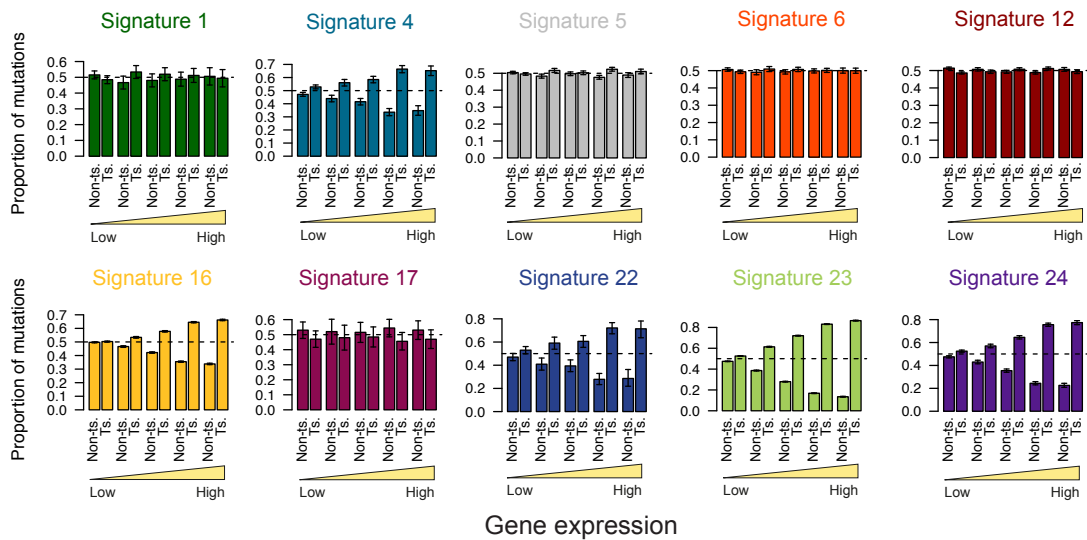

**Supplementary Figure 7. Transcriptional strand biases associated with liver cancer mutational signatures** (a) Analysis of transcriptional strand asymmetries. The proportions of mutations occurring on the transcribed (Ts.) and non-transcribed (Non-ts.) strand are represented for each mutational signature. Only the dominant substitution type (indicated in parentheses) was considered for each signature. (b) Transcriptional strand asymmetry as a function of gene expression. Genes were split in 5 quintiles from low to high expression and the transcriptional strand asymmetry was estimated within each group. The asymmetry between the two strands is stronger in highly expressed genes.

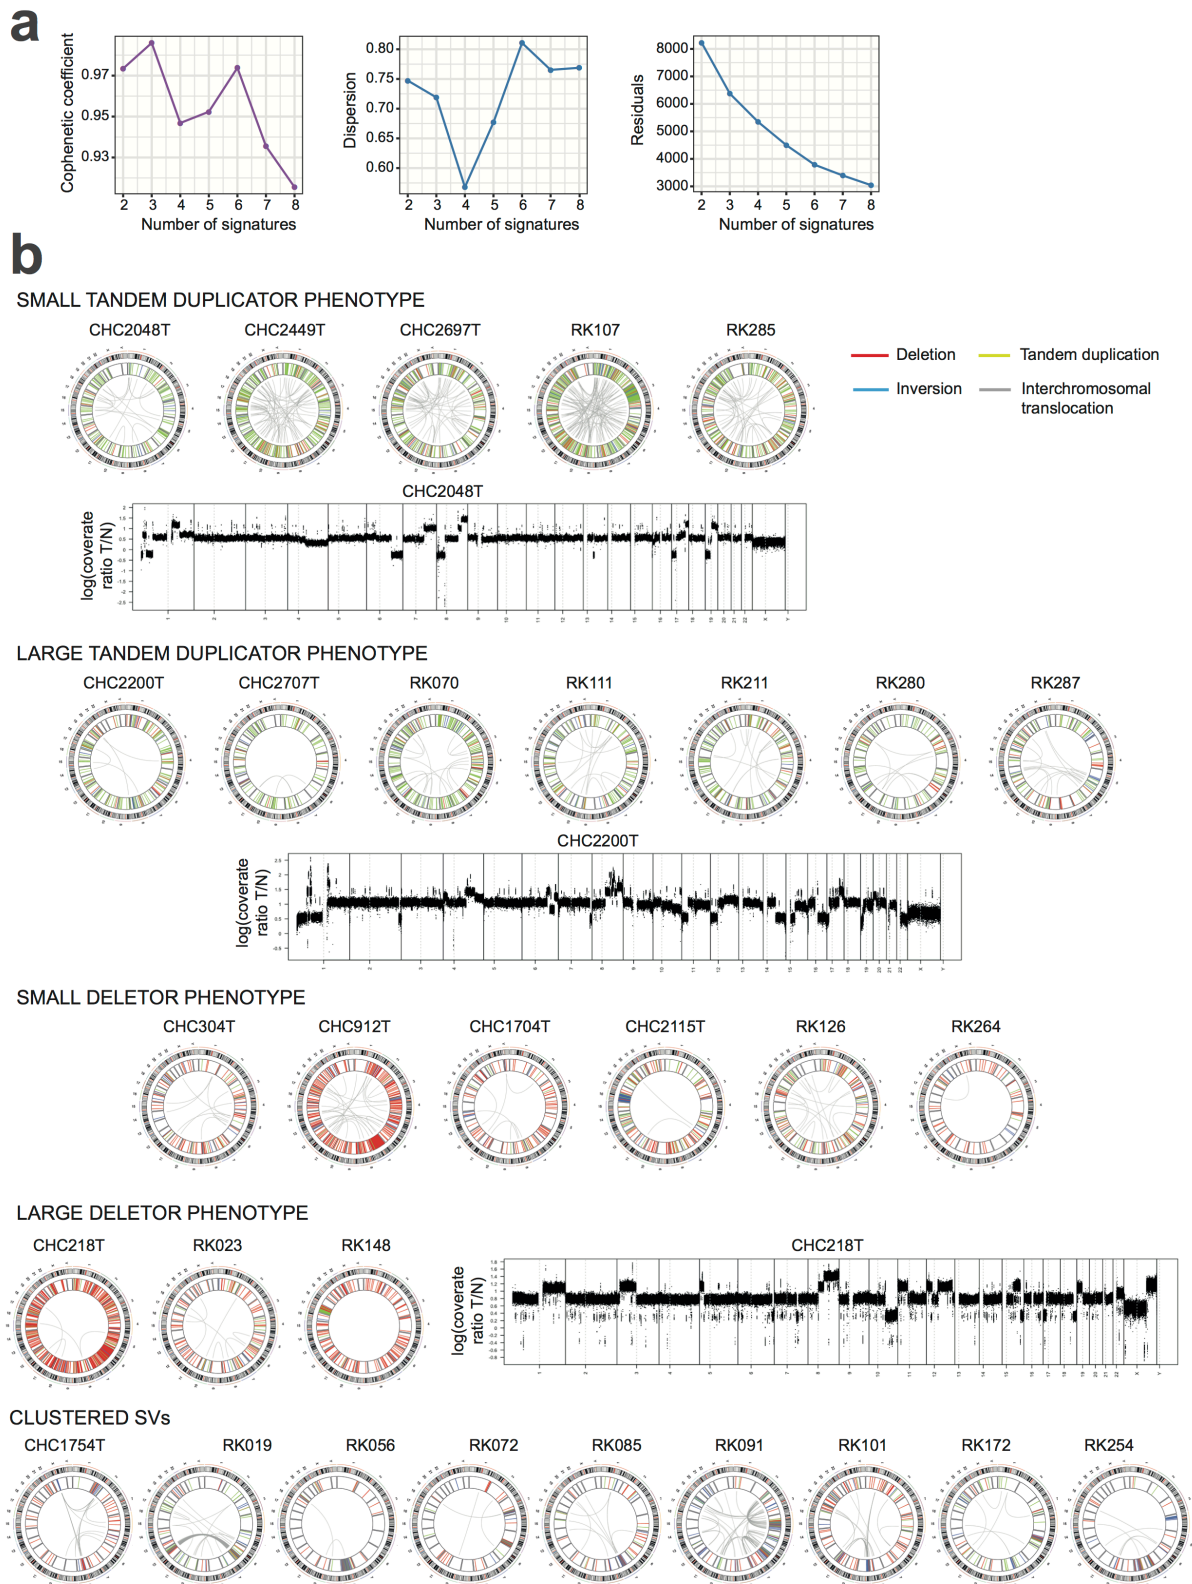

**Supplementary Figure 8. Structural rearrangement signature analysis.** (a) Non-negative matrix factorization (NMF) metrics used to determine the optimal number of signatures. With 6 signatures, we obtain good cophenetic coefficient and the best dispersion score. (b) Structural rearrangement profiles of tumors displaying specific phenotypes are represented with CIRCOS plots. Coverage log-ratio profiles from 3 representative tumors also show the accumulation of deletions and duplications of a specific size.



**a**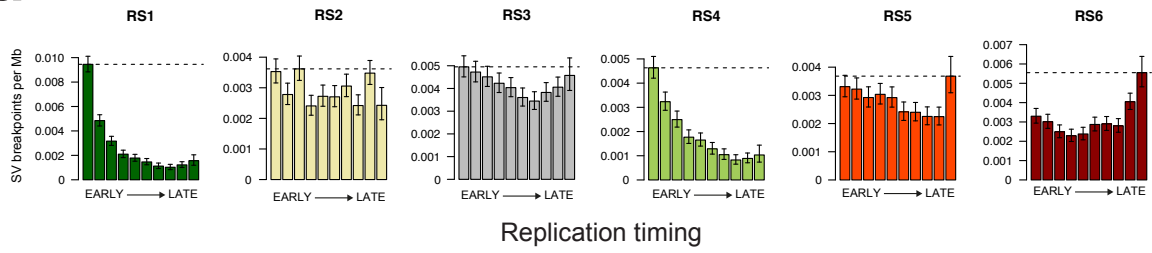**b**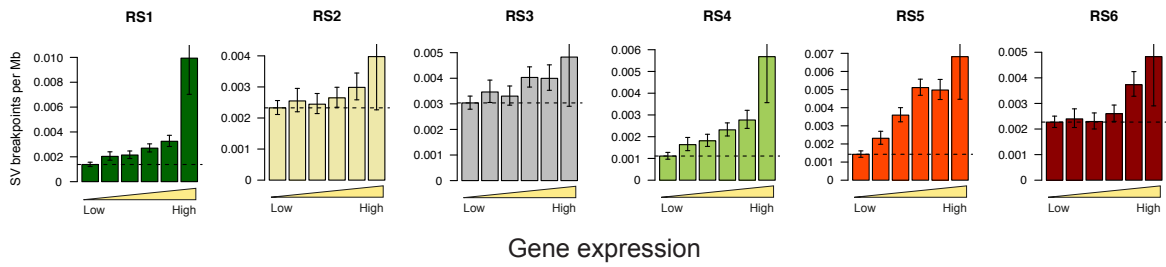

**Supplementary Figure 9. DNA replication and gene expression modulate the activity of structural rearrangement signatures. (a)** Correlation between replication timing and SV breakpoint rates broken down by SV signature. **(b)** Correlation between gene expression and SV breakpoint rates broken down by SV signature.

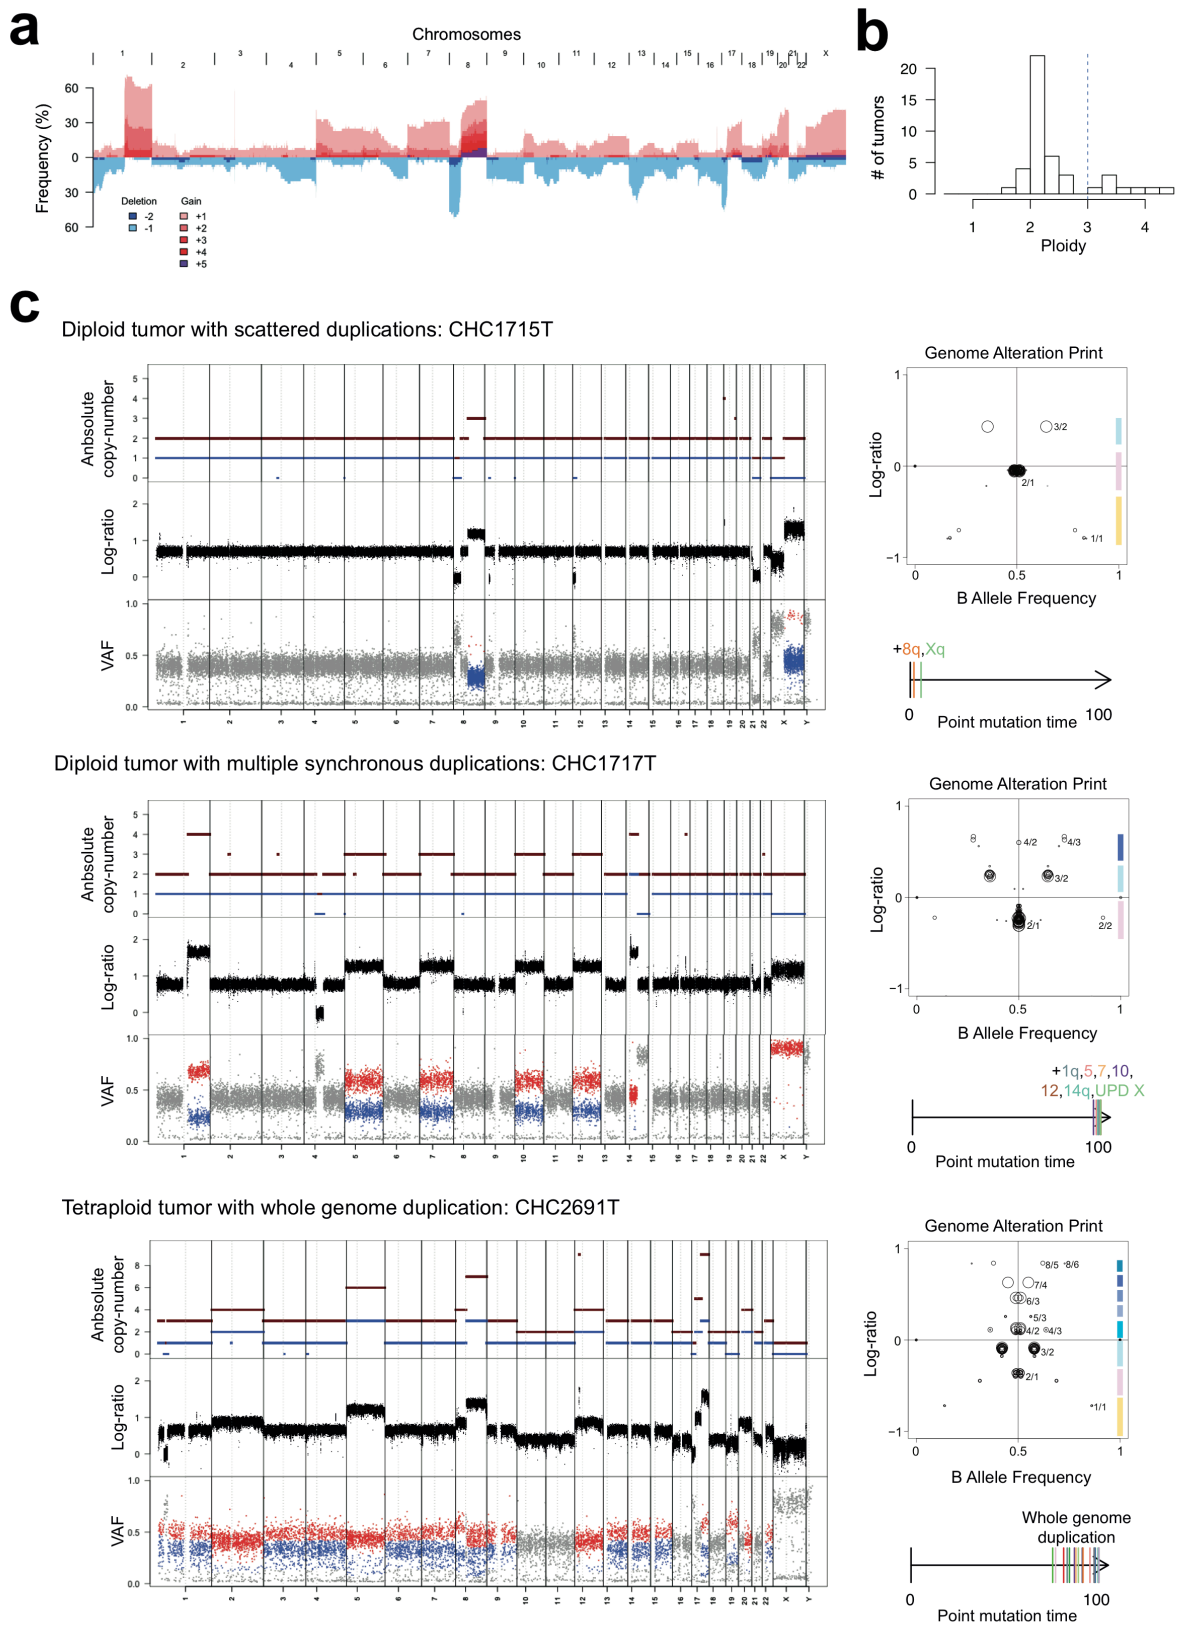

**Supplementary Figure 10: Copy-number analysis and duplication timing. (a)** Frequency of gains and deletions along the genome. The number of copies above (gains) or below (deletions) ploidy is indicated with a color code. **(b)** Distribution of ploidy across the cohort. **(c)** Representative examples of a diploid tumor with scattered

duplications (top), a diploid tumor with multiple synchronous duplications (middle) and a tetraploid tumor with whole genome duplication (bottom). Absolute copy numbers (total: red, minor allele: blue) and coverage log-ratio between tumor and normal are represented along the genome. The VAF (Variant Allele Fraction) plot represents the proportion of mutated reads for each somatic mutation. Duplicated mutations are indicated in red and non-duplicated mutations in blue. The ratio of duplicated over non-duplicated mutations was used to time duplications as explained in Online Methods. Tumor CHC1715T displays early duplications with few duplicated mutations. By contrast, tumors CHC1717T and CHC2691T have similar numbers of duplicated and non-duplicated mutations, indicating that these events occurred very late in tumor history. Note the similar ratios of duplicated and non-duplicated mutations indicating synchronous acquisition of multiple gains. The Genome Alteration Print (GAP) patterns on the right side are sideview projections of segmented log ratio (y axis) and B Allele Frequency (x axis) used to determine visualize absolute copy-numbers and tumor ploidy (Popova et al., Genome Biol 2009). Each circle represents a chromosome segment and is designated by the ratio of copy-number to most abundant allele counts (e.g. 3/2 indicates that the segment has a total copy number of 3, with 2 copies of one allele, and 1 of the other).

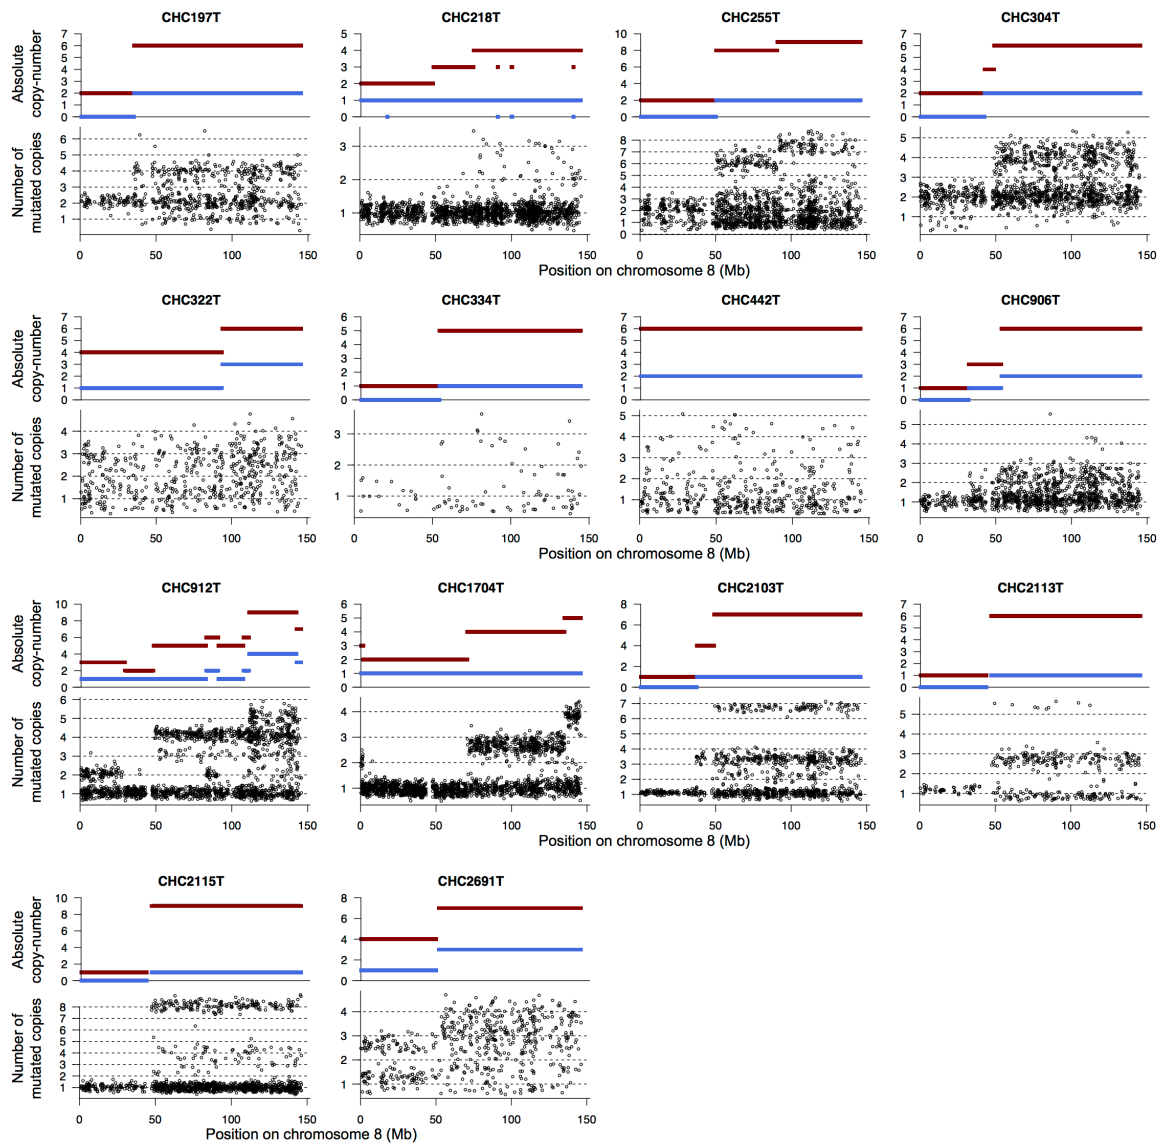

**Supplementary Figure 11: Chromosome 8q gains are acquired and selected repeatedly along tumorigenesis.** Fourteen out of 44 tumors displayed  $\geq 2$  extra-copies of chromosome arm 8q in our series. For each tumor, the top panel represents the total copy-number (red) and the copy-number of the minor allele (blue) along chromosome 8. The bottom panel indicates the estimated number of chromosomes harboring each somatic mutation (multiplicity), estimated as explained in Online Methods. Most cases display several levels of multiplicities, indicating that the total copy-number was not achieved in a single step but through several rounds of duplication.

## Supplementary Table 1: Clinical annotations

| Tumor ID | Tumor type                           | Gender | Age | Geographic origin | Alcohol Intake | Hepatitis B | Hepatitis C | Hemochromatosis | Metabolic syndrome | Tobacco | Without etiology | Edmonson grade | Fibrosis stage (METAVIR) | Largest nodule Diameter (mm) | Satellite nodules | Vascular Invasion |
|----------|--------------------------------------|--------|-----|-------------------|----------------|-------------|-------------|-----------------|--------------------|---------|------------------|----------------|--------------------------|------------------------------|-------------------|-------------------|
| CHC018T  | HCC                                  | F      | 35  | Africa            | no             | yes         | no          | no              | no                 | no      | no               | III            | F2                       | 170                          | no                | yes               |
| CHC1704T | HCC                                  | M      | 44  | Africa            | no             | yes         | no          | no              | no                 | no      | no               | III            | F3                       | 140                          | yes               | yes               |
| CHC1715T | HCC                                  | M      | 72  | Europe            | yes            | no          | no          | no              | no                 | yes     | no               | II             | F1                       | 60                           | no                | no                |
| CHC1717T | HCC                                  | M      | 51  | Africa            | no             | yes         | no          | no              | no                 | N.d.    | no               | II             | F4                       | 55                           | yes               | yes               |
| CHC1754T | HCC                                  | M      | 35  | Africa            | no             | yes         | no          | no              | no                 | no      | no               | IV             | F2                       | 170                          | yes               | yes               |
| CHC1977T | HCC                                  | M      | 73  | Europe            | yes            | no          | no          | no              | no                 | N.d.    | no               | III            | F2                       | 130                          | yes               | yes               |
| CHC2048T | HCC                                  | M      | 65  | Europe            | yes            | no          | no          | no              | no                 | no      | no               | III            | F0                       | 100                          | yes               | yes               |
| CHC205T  | HCC                                  | M      | 46  | Europe            | yes            | no          | no          | no              | no                 | yes     | no               | III            | F0                       | 100                          | no                | no                |
| CHC2103T | HCC                                  | M      | 56  | Europe            | yes            | no          | yes         | no              | no                 | yes     | no               | III            | F1                       | 28                           | yes               | yes               |
| CHC2111T | HCC                                  | F      | 55  | Europe            | no             | no          | no          | no              | no                 | yes     | yes              | II             | F1                       | 60                           | no                | no                |
| CHC2113T | HCC                                  | M      | 61  | Europe            | yes            | no          | no          | no              | no                 | no      | no               | III            | F1                       | 90                           | no                | no                |
| CHC2115T | HCC                                  | M      | 74  | Europe            | yes            | no          | no          | no              | yes                | yes     | no               | III            | F1                       | 100                          | yes               | yes               |
| CHC2132T | HCC                                  | M      | 56  | Europe            | no             | no          | no          | no              | yes                | yes     | no               | III            | F1                       | 180                          | no                | no                |
| CHC218T  | HCC                                  | M      | 69  | Europe            | no             | no          | no          | no              | yes                | no      | no               | III            | F1                       | 130                          | yes               | yes               |
| CHC2200T | HCC                                  | M      | 68  | Europe            | no             | no          | no          | no              | yes                | yes     | no               | IV             | F1                       | 110                          | yes               | yes               |
| CHC2443T | HCC                                  | M      | 73  | Europe            | yes            | no          | no          | no              | yes                | yes     | no               | III            | F1                       | 48                           | no                | yes               |
| CHC2448T | HCC                                  | M      | 81  | Europe            | no             | no          | no          | no              | yes                | no      | no               | II             | F1                       | 75                           | no                | yes               |
| CHC2449T | HCC                                  | M      | 80  | Europe            | no             | no          | no          | no              | yes                | yes     | no               | IV             | F0                       | 90                           | yes               | no                |
| CHC2538T | HCC                                  | F      | 75  | Europe            | no             | no          | no          | no              | yes                | no      | no               | II             | F2                       | 40                           | no                | no                |
| CHC2539T | HCC                                  | F      | 41  | Europe            | no             | no          | no          | no              | no                 | yes     | yes              | III            | F0                       | 160                          | yes               | yes               |
| CHC2691T | HCC                                  | M      | 69  | Europe            | yes            | no          | no          | no              | yes                | N.d.    | no               | III            | F1                       | 60                           | no                | no                |
| CHC2697T | HCC                                  | M      | 64  | Europe            | yes            | no          | no          | no              | no                 | no      | no               | IV             | F1                       | 110                          | yes               | yes               |
| CHC2707T | HCC                                  | M      | 78  | Europe            | no             | no          | no          | yes             | no                 | yes     | no               | II             | F1                       | 30                           | no                | yes               |
| CHC304T  | HCC                                  | M      | 77  | Europe            | yes            | no          | no          | no              | no                 | yes     | no               | III            | F1                       | 180                          | no                | yes               |
| CHC309T  | HCC                                  | F      | 69  | Europe            | no             | no          | yes         | no              | no                 | N.d.    | no               | III            | F2                       | 20                           | no                | yes               |
| CHC314T  | HCC                                  | M      | 71  | Europe            | yes            | no          | yes         | no              | no                 | N.d.    | no               | II             | F2                       | 45                           | no                | no                |
| CHC320T  | HCC                                  | M      | 65  | Europe            | yes            | no          | yes         | no              | no                 | N.d.    | no               | III            | F4                       | 35                           | no                | no                |
| CHC322T  | HCC                                  | M      | 74  | Europe            | yes            | no          | no          | no              | no                 | N.d.    | no               | III            | F4                       | 40                           | no                | no                |
| CHC429T  | HCC                                  | F      | 65  | Europe            | no             | no          | no          | no              | no                 | no      | yes              | III            | F0                       | 45                           | yes               | yes               |
| CHC433T  | HCC                                  | M      | 70  | Europe            | yes            | no          | no          | no              | yes                | N.d.    | no               | II             | F1                       | 180                          | yes               | yes               |
| CHC892T  | HCC                                  | F      | 72  | Europe            | no             | no          | no          | no              | no                 | no      | yes              | I              | F0                       | 55                           | no                | no                |
| CHC909T  | HCC                                  | M      | 70  | Europe            | no             | no          | no          | no              | no                 | yes     | yes              | III            | F1                       | 210                          | yes               | yes               |
| CHC912T  | HCC                                  | M      | 78  | Europe            | yes            | no          | yes         | no              | no                 | yes     | no               | IV             | F1                       | 60                           | yes               | yes               |
| CHC255T  | FLC                                  | F      | 39  | Europe            | no             | no          | no          | no              | no                 | yes     | yes              | NA             | F0                       | 140                          | yes               | no                |
| CHC906T  | FLC                                  | F      | 50  | Europe            | no             | no          | no          | no              | no                 | N.d.    | yes              | NA             | F1                       | 80                           | no                | no                |
| CHC334T  | FLC                                  | F      | 24  | Europe            | no             | no          | no          | no              | no                 | N.d.    | yes              | NA             | F1                       | 90                           | no                | no                |
| CHC442T  | FLC                                  | F      | 27  | Europe            | no             | no          | no          | no              | no                 | yes     | yes              | NA             | F0                       | 100                          | yes               | yes               |
| CHC361TA | HCC in HCA (progression of CHC361TB) | F      | 67  | Europe            | no             | no          | no          | no              | yes                | N.d.    | no               | II             | F1                       | 60                           | no                | no                |
| CHC361TB | HCA                                  | F      | 67  | Europe            | no             | no          | no          | no              | yes                | N.d.    | no               | NA             | F1                       | 60                           | NA                | NA                |
| CHC465T  | HCC in HCA (progression of CHC464T)  | F      | 42  | Europe            | no             | no          | no          | no              | no                 | yes     | yes              | I              | F0                       | 100                          | no                | no                |
| CHC464T  | HCA                                  | F      | 42  | Europe            | no             | no          | no          | no              | no                 | yes     | yes              | NA             | F0                       | 120                          | NA                | NA                |
| CHC2432T | HCA                                  | F      | 43  | Europe            | no             | na          | N.d.        | no              | no                 | no      | yes              | NA             | F0                       | 15                           | NA                | NA                |
| CHC2446T | HCA                                  | F      | 45  | Europe            | no             | no          | no          | no              | no                 | yes     | yes              | NA             | F1                       | 50                           | NA                | NA                |
| CHC605T  | HCA                                  | F      | 47  | Europe            | no             | no          | no          | no              | yes                | no      | no               | NA             | F1                       | 60                           | NA                | NA                |

HCC: Hepatocellular Carcinoma; FLC: Fibrolamellar Carcinoma; HCA: Hepatocellular Adenoma

N.d.: Not determined

NA: Not Applicable (e.g. "Edmonson Grade" is not applicable to HCA)

**Supplementary Table 2: Coverage and variant calling statistics**

| Tumor ID | Sequencing Series | Tumor Coverage | Normal Coverage | # of somatic SNVs | # of somatic indels | # of somatic SVs |
|----------|-------------------|----------------|-----------------|-------------------|---------------------|------------------|
| CHC1704T | Integrage         | 76.54          | 38.97           | 33509             | 878                 | 114              |
| CHC1715T | Integrage         | 92.15          | 55.57           | 23661             | 1076                | 21               |
| CHC1717T | Integrage         | 78.22          | 39.83           | 17469             | 795                 | 12               |
| CHC1754T | Integrage         | 71.07          | 35.11           | 20852             | 844                 | 174              |
| CHC2048T | Integrage         | 89.95          | 61.45           | 13534             | 650                 | 186              |
| CHC2103T | Integrage         | 97.52          | 63.65           | 16913             | 836                 | 46               |
| CHC2111T | Integrage         | 87.53          | 52.26           | 6059              | 278                 | 9                |
| CHC2113T | Integrage         | 100.52         | 59.34           | 7988              | 450                 | 7                |
| CHC2115T | Integrage         | 96.37          | 49.79           | 15818             | 818                 | 134              |
| CHC2132T | Integrage         | 100.66         | 54.89           | 27878             | 2125                | 46               |
| CHC218T  | Integrage         | 99.47          | 54.41           | 21208             | 1053                | 497              |
| CHC2200T | Integrage         | 100.38         | 47.6            | 17995             | 960                 | 191              |
| CHC2432T | Integrage         | 52.8           | 58.88           | 2921              | 193                 | 1                |
| CHC2443T | Integrage         | 98.74          | 42.46           | 12924             | 835                 | 102              |
| CHC2446T | Integrage         | 93.74          | 49.86           | 5289              | 166                 | 4                |
| CHC2448T | Integrage         | 87.64          | 55.68           | 12885             | 808                 | 20               |
| CHC2449T | Integrage         | 96.9           | 55.06           | 11782             | 681                 | 494              |
| CHC2538T | Integrage         | 94.85          | 56.74           | 13939             | 759                 | 22               |
| CHC2539T | Integrage         | 101.19         | 57.83           | 6125              | 344                 | 33               |
| CHC2691T | Integrage         | 96.09          | 57.26           | 9760              | 686                 | 14               |
| CHC2697T | Integrage         | 94.3           | 58.73           | 14097             | 757                 | 314              |
| CHC2707T | Integrage         | 86.18          | 46.44           | 13032             | 538                 | 93               |
| CHC361TA | Integrage         | 84.74          | 56.07           | 9923              | 184                 | 9                |
| CHC361TB | Integrage         | 83.51          | 55.78           | 7654              | 187                 | 10               |
| CHC464T  | Integrage         | 86.31          | 58.4            | 19037             | 325                 | 4                |
| CHC465T  | Integrage         | 84             | 58.11           | 14760             | 626                 | 17               |
| CHC605T  | Integrage         | 90.15          | 57.88           | 5748              | 169                 | 2                |
| CHC892T  | Integrage         | 64.95          | 37.67           | 609296            | 1324                | 13               |
| CHC909T  | Integrage         | 94.83          | 49.22           | 15156             | 1109                | 50               |
| CHC912T  | Integrage         | 96.3           | 53.77           | 25775             | 2251                | 370              |
| CHC018T  | CNG               | 102.02         | 101.41          | 7804              | 747                 | 101              |
| CHC197T  | CNG               | 106.9          | 90.79           | 12440             | 929                 | 16               |
| CHC205T  | CNG               | 108.73         | 91.99           | 11307             | 980                 | 50               |
| CHC255T  | CNG               | 89.31          | 56.09           | 23069             | 754                 | 78               |
| CHC304T  | CNG               | 79.52          | 93.75           | 22173             | 2253                | 136              |
| CHC309T  | CNG               | 100.63         | 111.66          | 9559              | 558                 | 39               |
| CHC314T  | CNG               | 90.05          | 116.4           | 15677             | 853                 | 143              |
| CHC320T  | CNG               | 94.06          | 98.8            | 9907              | 680                 | 65               |
| CHC322T  | CNG               | 93.62          | 101.1           | 10303             | 511                 | 72               |
| CHC334T  | CNG               | 108.4          | 113.67          | 2162              | 140                 | 13               |
| CHC429T  | CNG               | 108.34         | 114.29          | 26459             | 915                 | 31               |
| CHC433T  | CNG               | 97.84          | 112.55          | 35518             | 1256                | 70               |
| CHC442T  | CNG               | 98.37          | 94.44           | 6603              | 137                 | 13               |
| CHC906T  | CNG               | 109.02         | 73.87           | 19156             | 624                 | 70               |

### Supplementary Table 3: HBV insertion sites identified in 44 liver tumors

| Tumor ID | Virus | Chromosome | Position  | Gene          |
|----------|-------|------------|-----------|---------------|
| CHC1704T | HBV   | chr4       | 151597758 | LRBA          |
| CHC1704T | HBV   | chr5       | 1297642   | TERT promoter |
| CHC1704T | HBV   | chr11      | 45329533  | Intergenic    |
| CHC1704T | HBV   | chrX       | 72337840  | Intergenic    |
| CHC1717T | HBV   | chr5       | 1295568   | TERT promoter |
| CHC1754T | HBV   | chr6       | 111627366 | REV3L         |

### Supplementary Table 4: Comparison of clinical annotations between the INSERM and ICGC-Japan HCC series

| Clinical feature        |             | INSERM series (n= 35 HCC) | ICGC-Japan (n=264 HCC) | P-value                     | Test                   |
|-------------------------|-------------|---------------------------|------------------------|-----------------------------|------------------------|
| Gender                  | Male        | 26 (74%)                  | 198 (75%)              | 1                           | Fisher's exact test    |
|                         | Female      | 9 (26%)                   | 66 (25%)               |                             |                        |
| Age (median)            |             | 69                        | 68                     | 0.59                        | Wilcoxon rank-sum test |
| Alcohol                 | Yes         | 16 (46%)                  | 105 (42%)              | 0.72                        | Fisher's exact test    |
|                         | No          | 19 (54%)                  | 145 (58%)              |                             |                        |
| HBV                     | Yes         | 4 (11%)                   | 78 (30%)               | 0.026 (Fisher's exact test) | Fisher's exact test    |
|                         | No          | 31 (89%)                  | 186 (70%)              |                             |                        |
| HCV                     | Yes         | 5 (14%)                   | 149 (56%)              | 2.59E-06                    | Fisher's exact test    |
|                         | No          | 30 (86%)                  | 115 (44%)              |                             |                        |
| Tobacco                 | Yes         | 15 (58%)                  | 143 (57%)              | 1                           | Fisher's exact test    |
|                         | No          | 11 (42%)                  | 107 (43%)              |                             |                        |
|                         | Missing     | 9                         | 14                     |                             |                        |
| Fibrosis stage*         | F0          | 0 (0%)                    | 12 (5%)                | 1.15E-05                    | Chi-square test        |
|                         | F1 or F0-F1 | 25 (71%)                  | 31 (12%)               |                             |                        |
|                         | F2 or F1-F2 | 0 (0%)                    | 66 (25%)               |                             |                        |
|                         | F3 or F2-F3 | 7 (20%)                   | 62 (23%)               |                             |                        |
|                         | F4          | 3 (9%)                    | 93 (35%)               |                             |                        |
| Tumor size (mm, median) |             | 90                        | 30                     | 3.25E-11                    | Wilcoxon rank-sum test |
| Edmonson grade          | I-II        | 11 (31%)                  | 185 (70%)              | 1.39E-05                    | Fisher's exact test    |
|                         | III-IV      | 24 (69%)                  | 78 (30%)               |                             |                        |
|                         | Missing     | 0                         | 1                      |                             |                        |
| Vascular invasion       | Yes         | 21 (60%)                  | 89 (34%)               | 0.0047                      | Fisher's exact test    |
|                         | No          | 14 (40%)                  | 171 (66%)              |                             |                        |
|                         | Missing     | 4                         | 0                      |                             |                        |

\* According to METAVIR score for the INSERM series, and the New Inuyama Classification for the ICGC-Japan series.

### Supplementary Table 5: Association between mutational signatures and risk factors

| Mutational signature | Clinical feature | P-value (univariate) | P-value (multivariate) |
|----------------------|------------------|----------------------|------------------------|
| Signature 1          | Female gender    | 0.004062173          | 0.019678568            |
| Signature 4          | Age              | 1.67E-05             | 6.27E-06               |
|                      | Tobacco          | 0.019146798          | 0.004285109            |
| Signature 6          | Female gender    | 0.01598921           | 0.01598921             |
| Signature 16         | Age              | 4.35E-05             | 0.000344604            |
|                      | Alcohol          | 2.01E-06             | 0.004154386            |
|                      | Male gender      | 1.53E-06             | 0.019915826            |
|                      | Tobacco          | 4.80E-05             | 0.04799814             |

## Supplementary Table 6: Subclonal mutations identified in driver genes

| Tumor ID | Hugo Symbol | Variant Classification | Genome Change          | Protein Change | Depth in non-tumor | Variant allele fraction in non-tumor | Depth in tumor | Variant Allele Fraction in tumor | Cancer Cell Fraction (CCF) | CCF confidence interval - lower bound | CCF confidence interval - upper bound |
|----------|-------------|------------------------|------------------------|----------------|--------------------|--------------------------------------|----------------|----------------------------------|----------------------------|---------------------------------------|---------------------------------------|
| CHC361TA | PTEN        | Missense_Mutation      | g.chr10:89720838A>T    | p.K330I        | 46                 | 0                                    | 78             | 0.038461538                      | 0.131                      | 0.027                                 | 0.37                                  |
| CHC361TA | ARID2       | Nonsense_Mutation      | g.chr12:46205216C>A    | p.Y100*        | 61                 | 0                                    | 80             | 0.0375                           | 0.128                      | 0.027                                 | 0.36                                  |
| CHC1715T | PTEN        | Missense_Mutation      | g.chr10:89692905G>A    | p.R130Q        | 58                 | 0                                    | 114            | 0.035087719                      | 0.091                      | 0.025                                 | 0.227                                 |
| CHC2443T | CTNNB1      | Missense_Mutation      | g.chr3:41266097G>A     | p.D32N         | 41                 | 0                                    | 99             | 0.141414141                      | 0.39                       | 0.219                                 | 0.623                                 |
| CHC2443T | CTNNB1      | Missense_Mutation      | g.chr3:41266101C>G     | p.S33C         | 40                 | 0                                    | 102            | 0.107843137                      | 0.297                      | 0.152                                 | 0.509                                 |
| CHC2443T | CTNNB1      | Missense_Mutation      | g.chr3:41266097G>T     | p.D32T         | 41                 | 0                                    | 99             | 0.02020202                       | 0.056                      | 0.027                                 | 0.788                                 |
| CHC2132T | FGA         | Silent                 | g.chr4:155507438A>G    | p.G381G        | 59                 | 0                                    | 73             | 0.04109589                       | 0.053                      | 0.011                                 | 0.149                                 |
| CHC2707T | ATP10B      | Missense_Mutation      | g.chr5:160049420G>T    | p.T598N        | 53                 | 0                                    | 66             | 0.045454545                      | 0.169                      | 0.035                                 | 0.472                                 |
| CHC309T  | ALB         | Frame_Shift_Del        | g.chr4:74284017delCAAG | p.I397fs       | 128                | 0                                    | 91             | 0.252747253                      | 0.637                      | 0.422                                 | 0.894                                 |
| CHC433T  | TSC2        | Silent                 | g.chr16:2107132C>T     | p.H267H        | 41                 | 0                                    | 24             | 0.083333333                      | 0.172                      | 0.021                                 | 0.559                                 |
| CHC018T  | AXIN1       | Nonsense_Mutation      | g.chr16:396458G>A      | p.Q190*        | 107                | 0                                    | 61             | 0.836065574                      | 0.827                      | 0.712                                 | 0.909                                 |
| CHC205T  | RB1         | Missense_Mutation      | g.chr13:49039143C>A    | p.R741S        | 38                 | 0                                    | 45             | 0.066666667                      | 0.174                      | 0.036                                 | 0.477                                 |
