# Supplementary material for: Mutational signatures reveal the dynamic interplay of risk factors and cellular processes during liver tumorigenesis
Source: PubMed Central journal article supplement (PMC5670220; doi:10.1038/s41467-017-01358-x), 2017-11-03
Supplement: 41467_2017_1358_MOESM5_ESM.pdf [file 41467_2017_1358_MOESM5_ESM.pdf]

# HBV

CHC018T, Female, 35yo, Africa  
HCC, F2-F3, 17cm, Hepatitis.B  
Drivers: AXIN1, IRF2

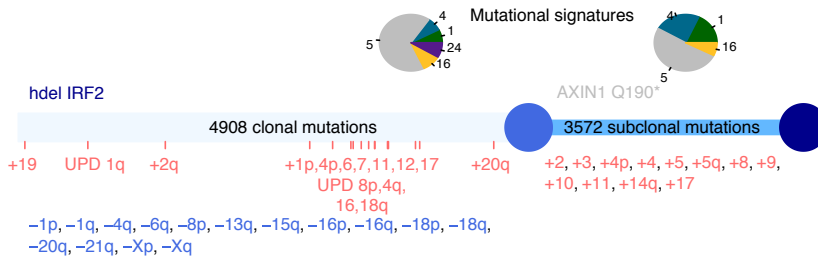

CHC1704T, Male, 43yo, Africa  
HCC, F2-F3, 14cm, Hepatitis.B  
Drivers: TERT, TP53, EPHA4

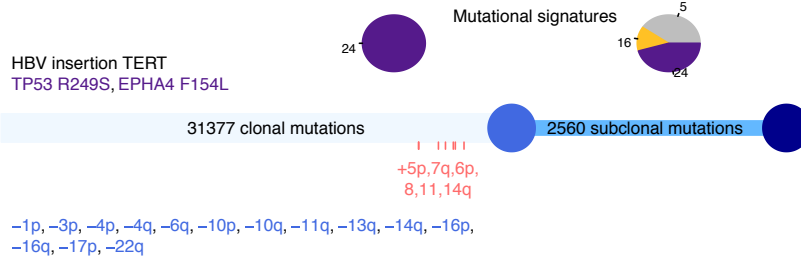

CHC1717T, Male, 50yo, Africa  
HCC, F4, 55cm, Hepatitis.B  
Drivers: TERT, RPL22

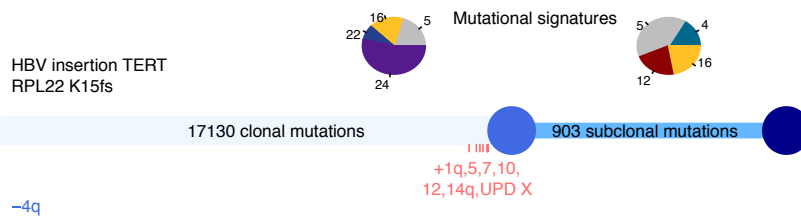

CHC1754T, Male, 34yo, Africa  
HCC, F2-F3, 17cm, Hepatitis.B  
Drivers: TERT, TP53, AXIN1, ALB

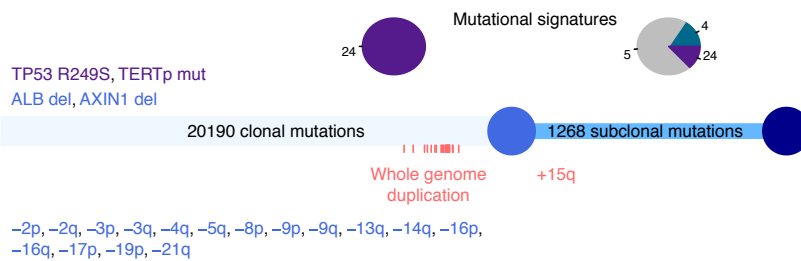

CHC2103T, Male, 56yo, Europe  
HCC, F0-F1, 3.8cm, Alcohol.Intake - Hepatitis.B - Hepatitis.C - Tobacco  
Drivers: CTNNB1, ACVR2A, RPS6KA3

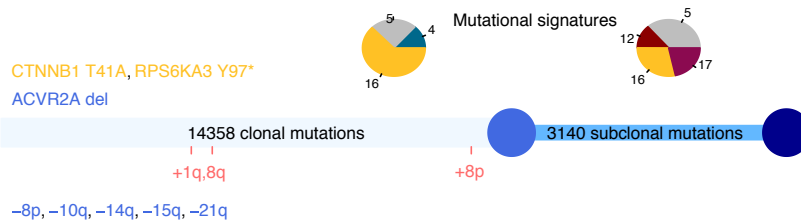

# HCV

CHC309T, Female, 69yo, Europe  
HCC, F2-F3, 2cm, Hepatitis.C  
Drivers: ALB, RPS6KA3

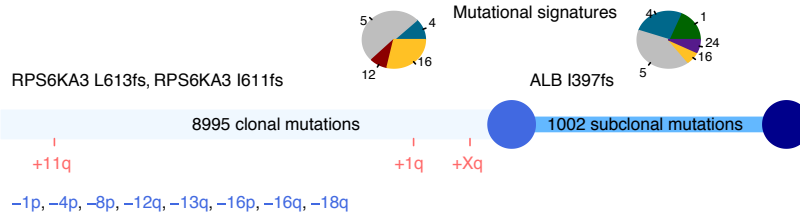

CHC314T, Male, 71yo, Europe  
HCC, F2-F3, 4.5cm, Alcohol.Intake - Hepatitis.C  
Drivers: TERT, TP53, AXIN1, ARID2

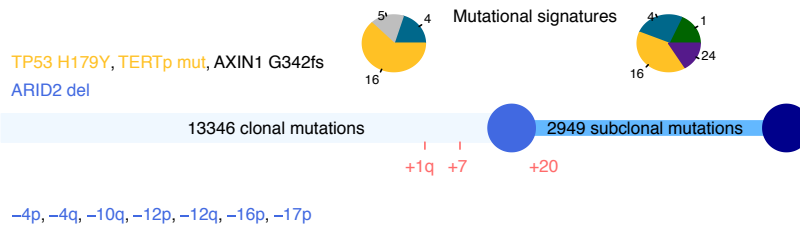

CHC320T, Male, 65yo, Europe  
HCC, F4, 3.5cm, Alcohol.Intake - Hepatitis.C  
Drivers: TERT, CTNNB1, ARID1A, FGA

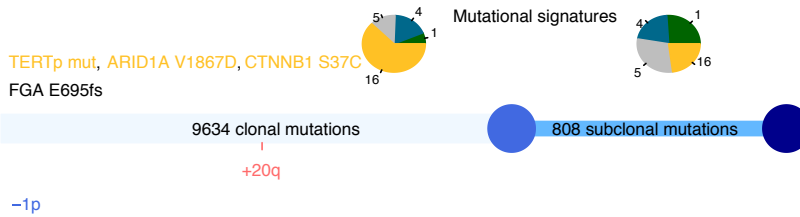

CHC912T, Male, 78yo, Europe  
HCC, F0-F1, 6cm, Alcohol.Intake - Hepatitis.C - Tobacco  
Drivers: CTNNB1

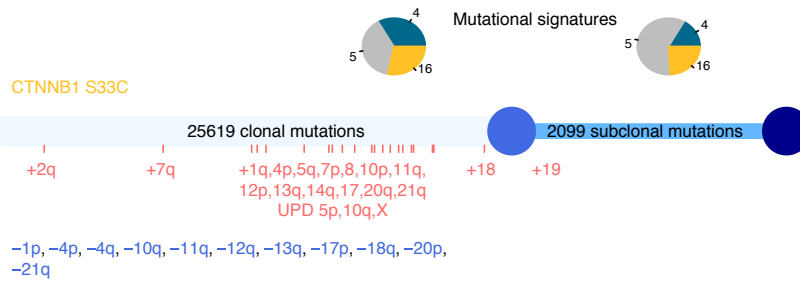

# Alcohol

CHC197T, Male, 73yo, Europe  
HCC, F2-F3, 13cm, Alcohol.Intake  
Drivers: TERT, CTNNB1, MET

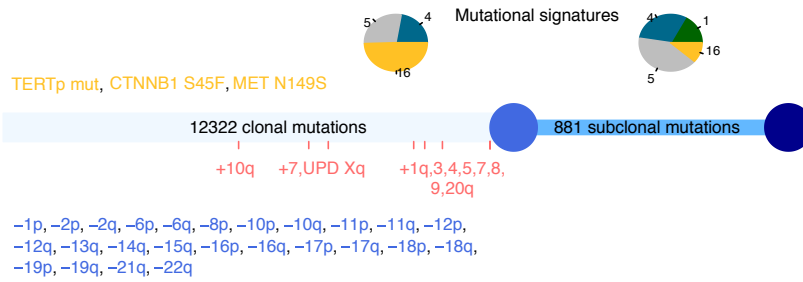

CHC205T, Male, 46yo, Europe  
HCC, F0-F1, 10cm, Alcohol.Intake – Tobacco  
Drivers: TERT, ARID1A, NFE2L2, CDKN2A, RB1, PTPN3

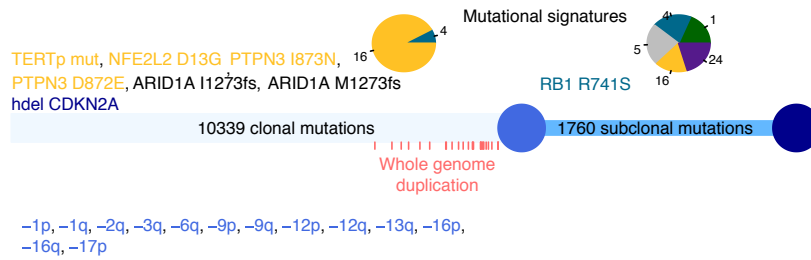

CHC304T, Male, 77yo, Europe  
HCC, F0-F1, 18cm, Alcohol.Intake – Tobacco  
Drivers: TERT, TP53, AXIN1, TSC2

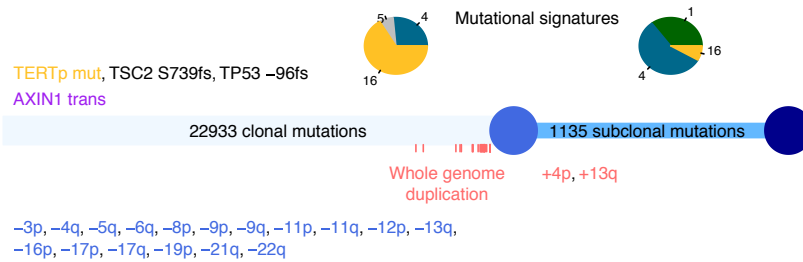

CHC322T, Male, 74yo, Europe  
HCC, F4, 4cm, Alcohol.Intake  
Drivers: TERT, ZNRF3

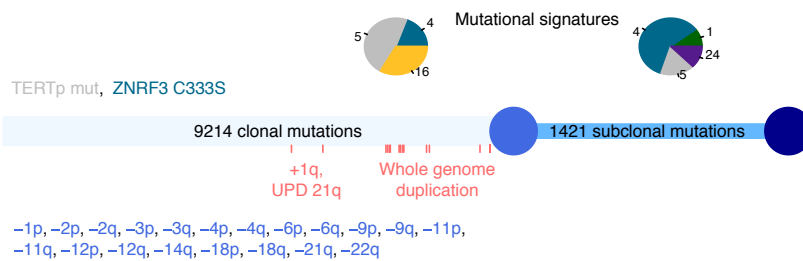

CHC433T, Male, 70yo, Europe  
HCC, F0-F1, 18cm, Alcohol.Intake – Metabolic syndrome  
Drivers: TERT, CTNNB1, ATP10B

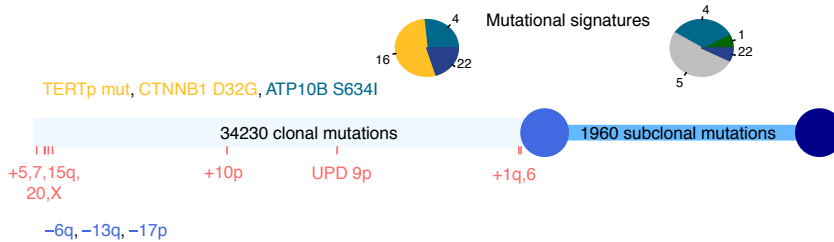

CHC1715T, Male, 72yo, Europe  
 HCC, F0-F1, 6cm, Alcohol.Intake – Tobacco  
 Drivers: TERT, CTNNB1, RPL22, CDKN2A, FGA, PTEN

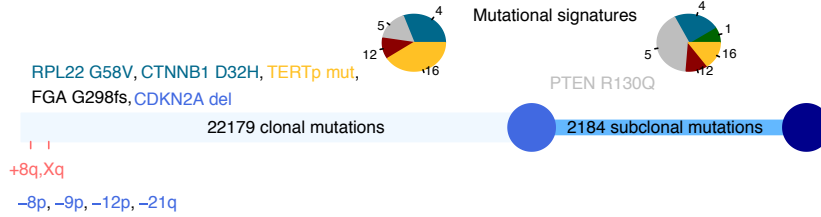

CHC2048T, Male, 65yo, Europe  
 HCC, F0-F1, 17cm, Alcohol.Intake  
 Drivers: TERT, TP53, MEF2C

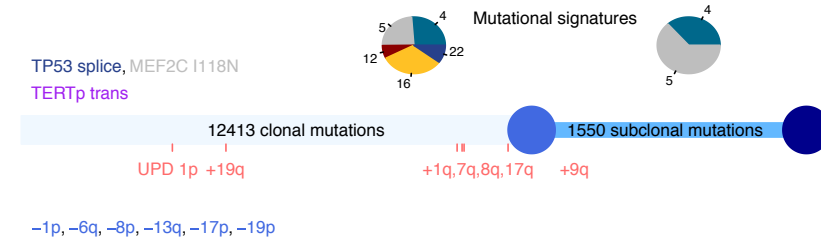

CHC2113T, Male, 61yo, Europe  
 HCC, F0-F1, 7cm, Alcohol.Intake  
 Drivers: TERT, CTNNB1, PTPN3

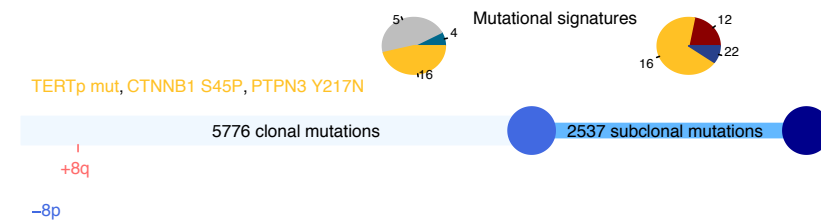

CHC2115T, Male, 74yo, Europe  
 HCC, F0-F1, 11cm, Alcohol.Intake – Metabolic.syndrome – Tobacco  
 Drivers: TERT, ARID2, RPS6KA3, KEAP1, ZNRF3

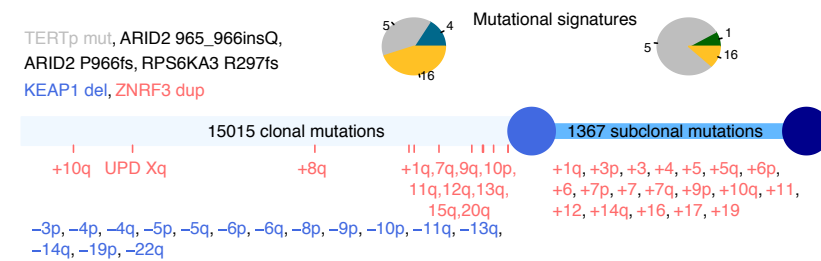

CHC2443T, Male, 74yo, Europe  
 HCC, F0-F1, 6.5cm, Alcohol.Intake – Metabolic.syndrome – Tobacco  
 Drivers: TERT, CTNNB1, TSC1, CCND1, CCNE1

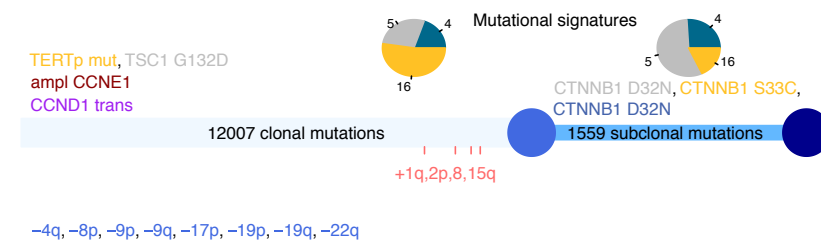

---

CHC2691T, Male, 69yo, Europe  
HCC, F0-F1, 6cm, Alcohol.Intake – Metabolic.syndrome  
Drivers: TERT, CTNNB1, ARID1A

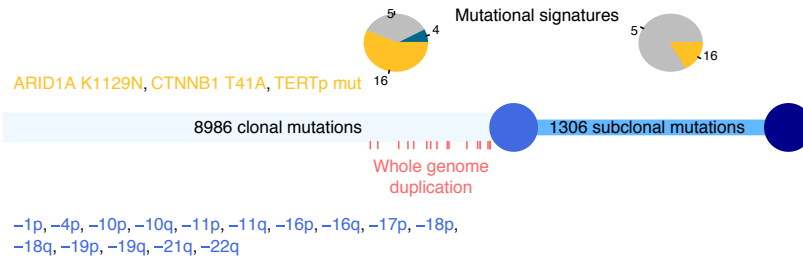

---

CHC2697T, Male, 64yo, Europe  
HCC, F0-F1, 15cm, Alcohol.Intake  
Drivers: TERT, CDKN1A, PTEN

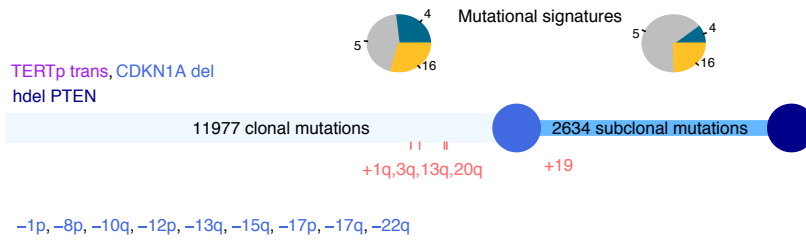

# Metabolic Syndrome

CHC218T, Male, 69yo, Europe  
 HCC, F0-F1, 13cm, Metabolic syndrome  
 Drivers: TERT, ACVR2A, MEF2C, PTEN

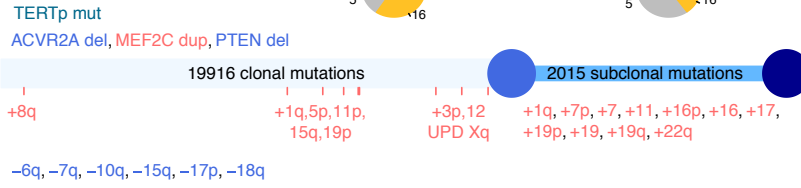

CHC2132T, Male, 57yo, Europe  
 HCC, F0-F1, 19cm, Metabolic syndrome - Tobacco  
 Drivers: TERT, TP53, ARID2, ACVR2A, KEAP1, PTEN, VEGFA, CCND1

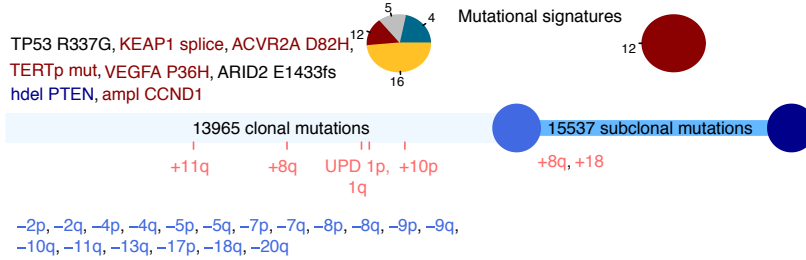

CHC2200T, Male, 69yo, Europe  
 HCC, F0-F1, 22cm, Metabolic syndrome - Tobacco  
 Drivers: TP53, CTNNB1, KEAP1, TSC2

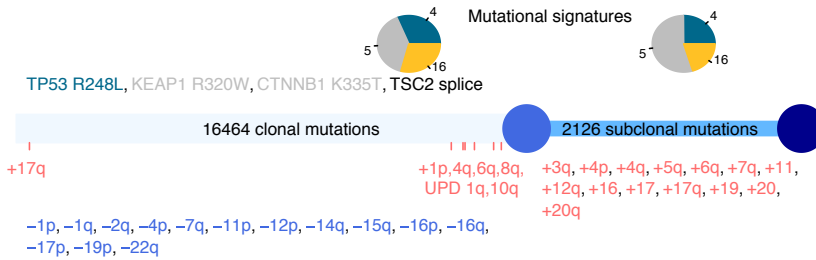

CHC2448T, Male, 82yo, Europe  
 HCC, F0-F1, 7.5cm, Metabolic syndrome  
 Drivers: TERT, CTNNB1, AXIN1, ARID2, NFE2L2

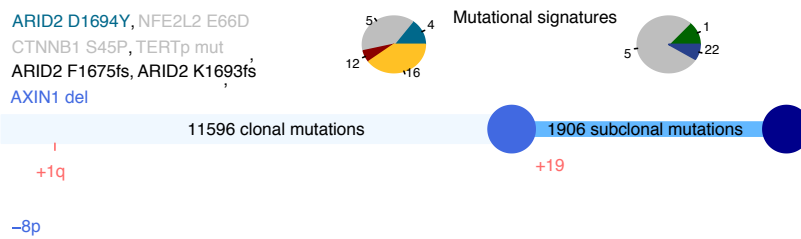

CHC2449T, Male, 80yo, Europe  
 HCC, F0-F1, 9cm, Metabolic syndrome - Diabetes - Tobacco  
 Drivers: TERT, ALB, NFE2L2, RB1

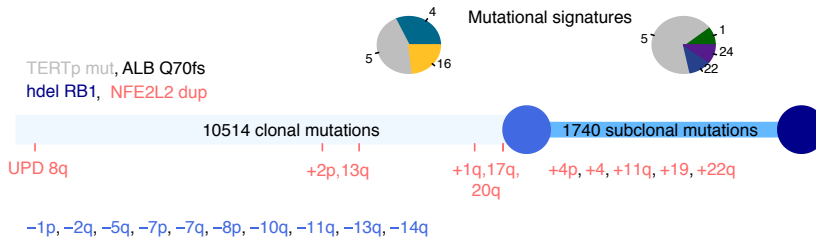

CHC2538T, Female, 76yo, Europe  
HCC, F2-F3, 5.5cm, Metabolic syndrome  
Drivers: TERT, CTNNB1, CDKN2A

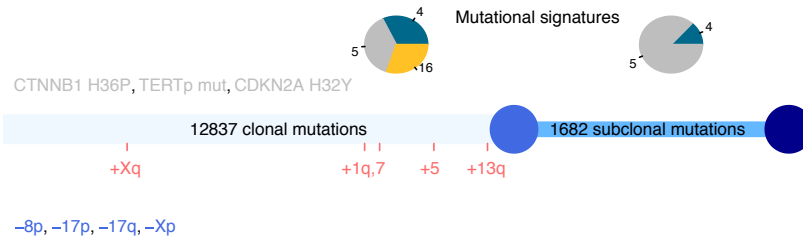

## Hemochromatosis

CHC2707T, Male, 78yo, Europe  
HCC, F0-F1, 3.5cm, Hemochromatosis - Tobacco  
Drivers: TERT, NFE2L2, ATP10B

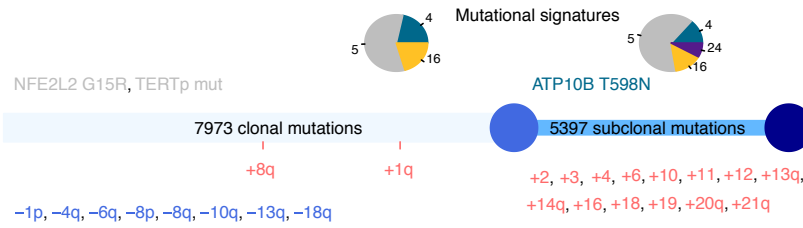

# Without Etiology

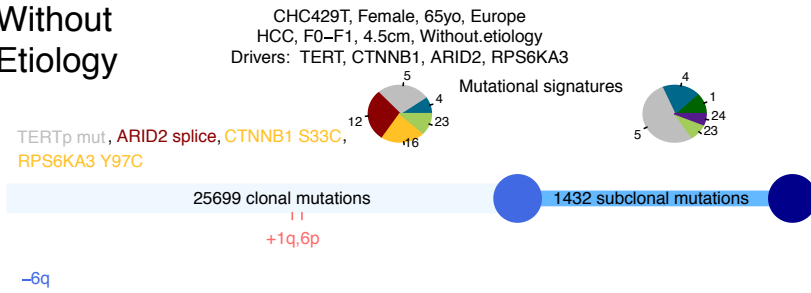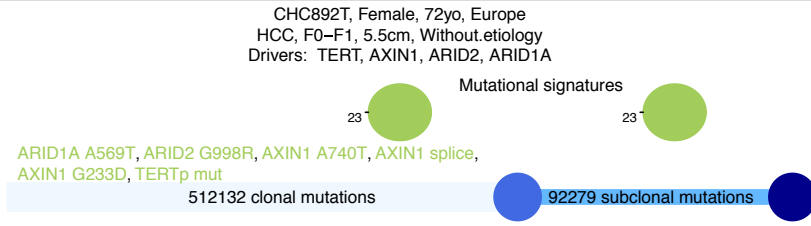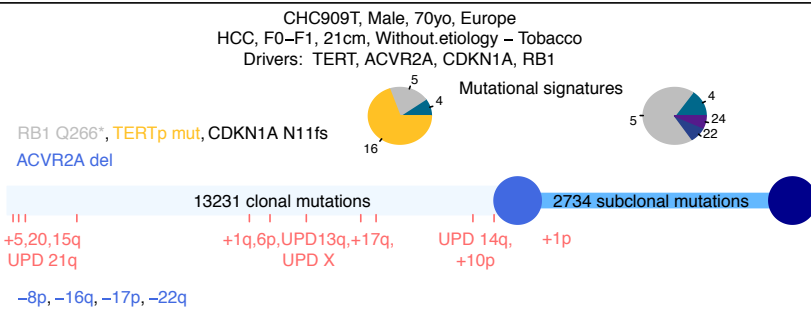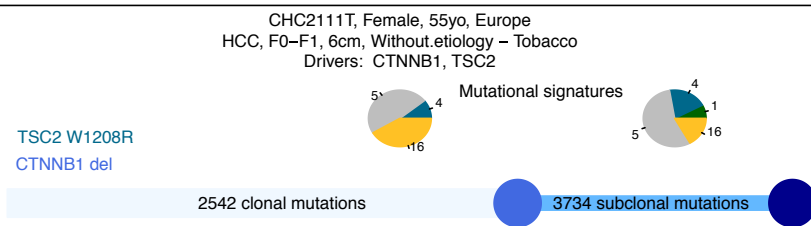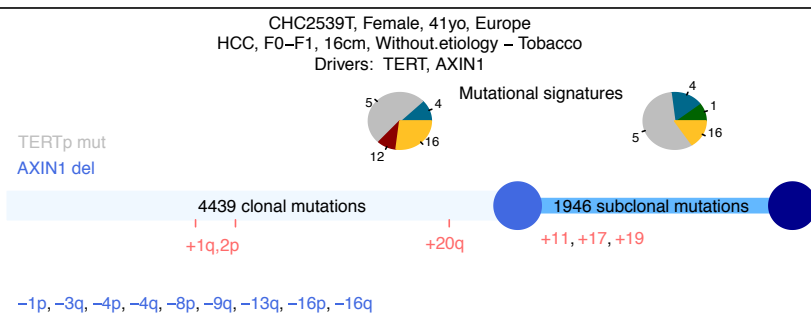



# Fibrolamellar Carcinomas

CHC255T, Female, 39yo, Europe  
 FLC, F0-F1, 14cm, Without.etiology - Tobacco  
 Drivers: ALB, ZNRF3, CCNE1

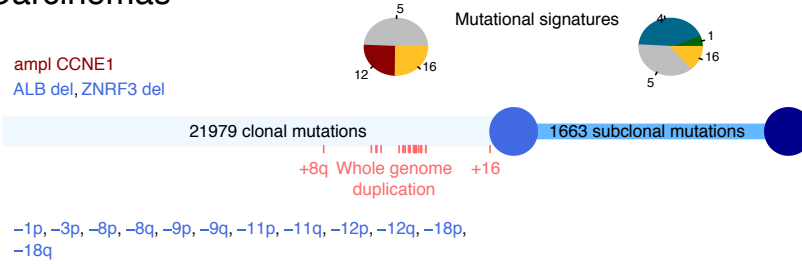

CHC334T, Female, 24yo, Europe  
 FLC, F0-F1, 9cm, Without.etiology  
 Drivers: TERT

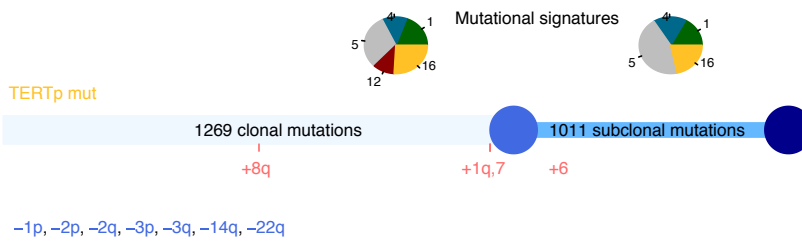

CHC442T, Female, 27yo, Europe  
 FLC, F0-F1, 10cm, Without.etiology - Tobacco  
 Drivers: TERT

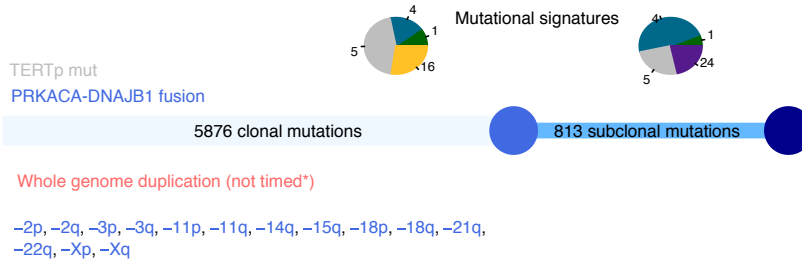

\* This tumor was too contaminated to distinguish duplicated from non-duplicated somatic mutations.

CHC906T, Female, 50yo, Europe  
 FLC, F0-F1, 8cm, Without.etiology

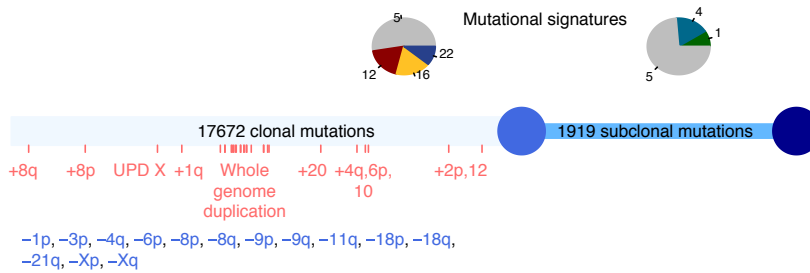

# HCA -> HCC transformation

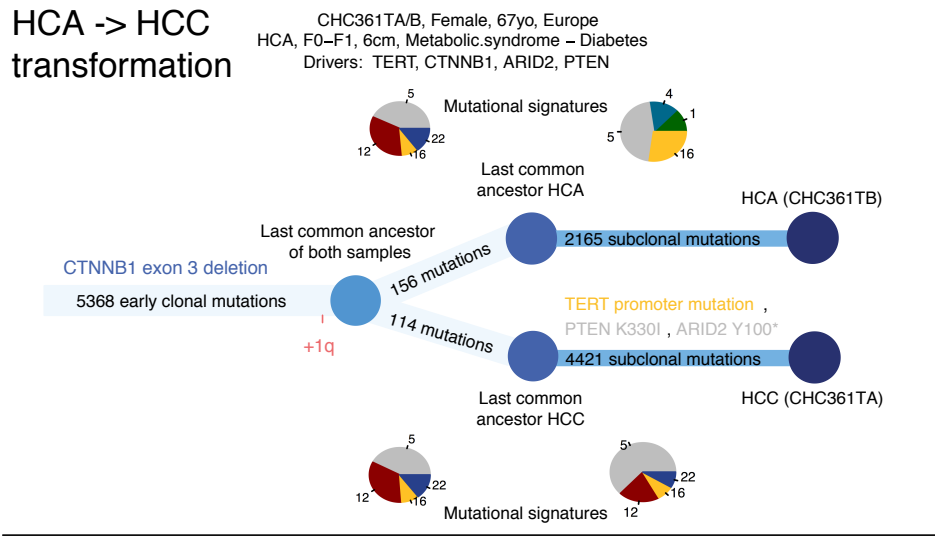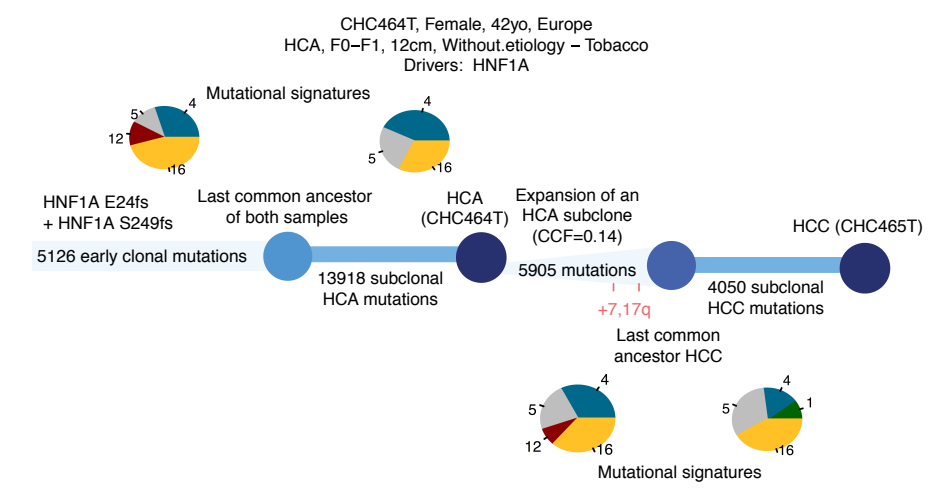

# HCA

CHC605T, Female, 47yo, Europe  
 HCA, F0-F1, 6cm, Metabolic syndrome – Diabetes  
 Drivers:

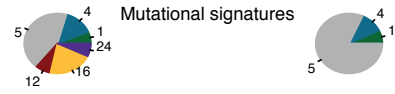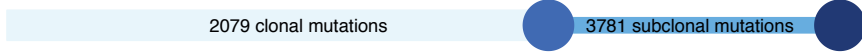

CHC2432T, Female, 43yo, Europe  
 HCA, F0-F1, 1.5cm, Without etiology  
 Drivers:

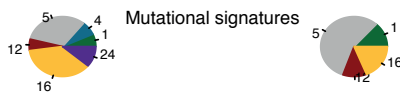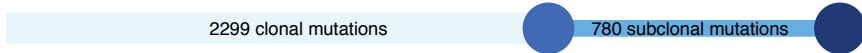

CHC2446T, Female, 45yo, Europe  
 HCA, F0-F1, 5cm, Without etiology – Tobacco  
 Drivers:

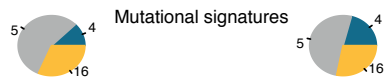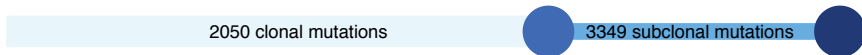

-6p

## Legend

Tumor progression tree

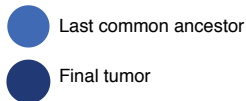

Clonal alterations

Subclonal alterations

Mutational signatures

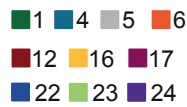

Copy-number and structural variations (SVs):

Deletions, Gains, Translocations
